# Supplementary material
Source: publisher site journal article supplement (https://www.dovepress.com/article/565281)
Supplement: Supplementary file 1 [file 565281%20Revised%20Supplementary%20Materials.docx]

**Supplementary table 1 Experimental CMS protocol**

|  | Stobe  light  exposure | Restraint  stress | Food  deprivation | Water  deprivation | Wet  bedding | White  noise | Day-night reversal | empty  bottle stimulation | exposure to a novel object | odor stimulation | tail clamping | food stimulation | odor stimulation |
| --- | --- | --- | --- | --- | --- | --- | --- | --- | --- | --- | --- | --- | --- |
| Day 1 | 10:00 am  ↓  12:00 pm | 15:00 pm  ↓  17:00 pm | 15:00 pm  ↓ | 15:00 pm  ↓ | 17:00 pm  ↓ |  |  |  |  |  |  |  |  |
| Day 2 |  |  | 14:00 pm | 14:00 pm  15:00 pm  ↓ | 10:00 am | 18:00 pm  ↓  21:30 pm | 21:00 pm  ↓ |  |  |  |  |  |  |
| Day 3 | 10:00 am  ↓  11:00 am |  | 17:00 pm  ↓ | 11:00 am  17:00 pm  ↓ |  |  | 9:00 am | 10:00 am  ↓  11:00 am | 17:00 pm  ↓ |  |  |  |  |
| Day 4 |  |  |  | 10:00 am |  |  |  |  | 10:00 pm | 10:30 am  ↓  17:00 pm | 17:00 pm  ↓  17:01 pm |  |  |
| Day 5 |  |  | 10:00 am |  |  | 12:00 pm  ↓  17:00 pm |  |  |  |  |  | 12:00 am  ↓  17:00 pm | 17:00 pm  ↓ |
| Day 6 |  |  | 10:00 am | 11:00 am  ↓ |  | 17:00 pm  ↓ |  |  |  |  |  |  | 10:00 am |
| Day 7 |  |  | 12:00 pm | 12:00 pm |  | 12:00 |  |  |  |  |  |  | 17:00 pm  ↓ |
| Day 1 |  |  |  |  |  |  |  |  |  |  |  |  | 10:00 am |

**
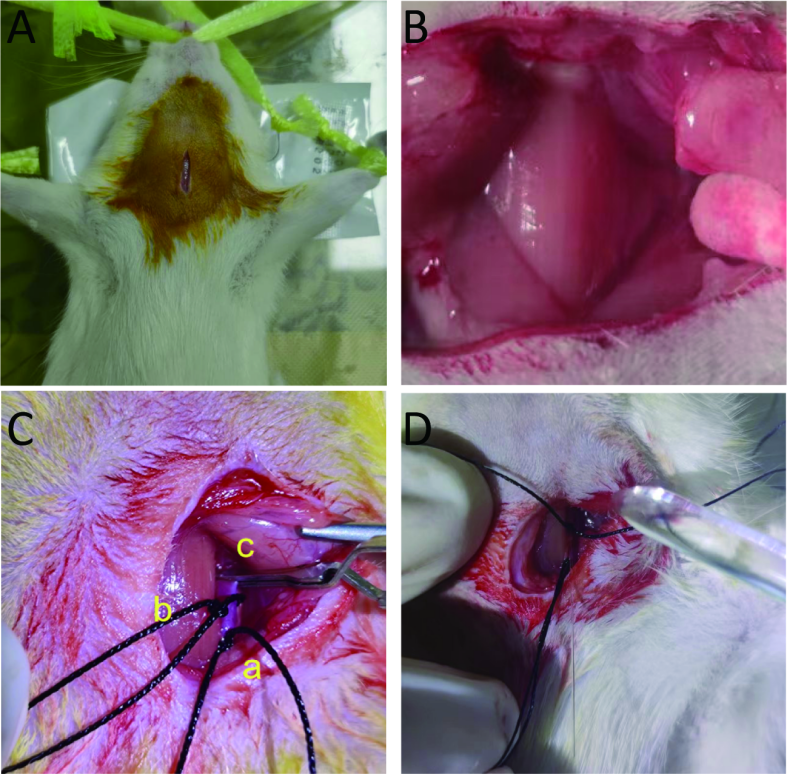
**

**Supplementary figure. 1 Experimental schedule of CMS**

1. Representative image of surgical incision. (B) Separate the tissues and locate the main artery. (C) The site of surgical ligation (a. Ligation of the CCA in the proximal direction; b. The distal end of the CCA is sewn with a loose knot; c. Arterial clip occludes the proximal bifurcation area of the CCA.). (D) The rounded filament was inserted into vessel.


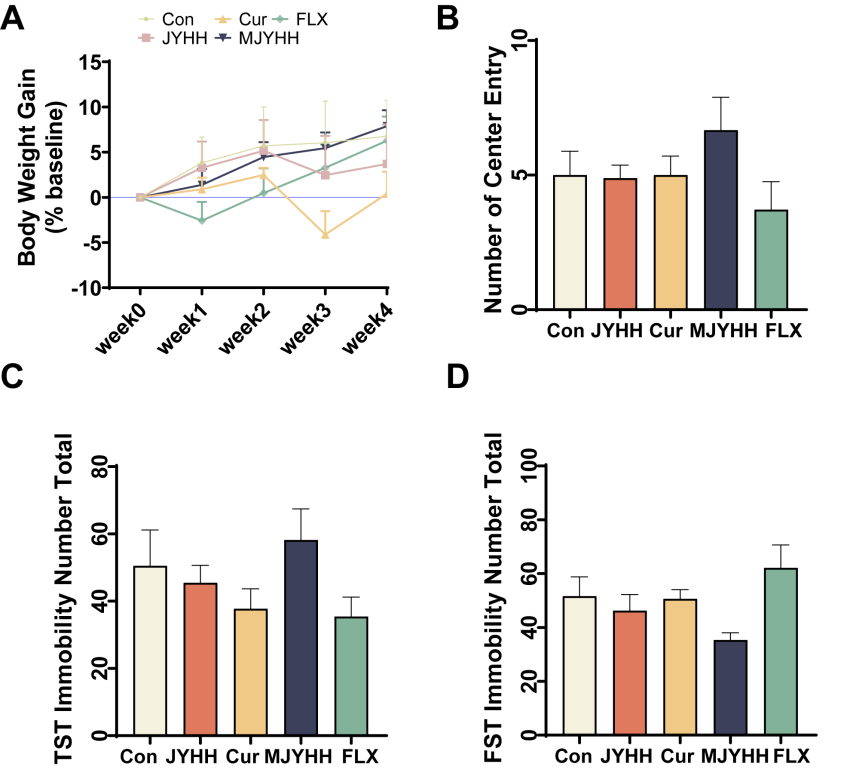


**Supplementary figure. 2 Indexes related to efficacy evaluation of MJYHH capsule.**

1. Gain of body weight. (B) Number of central area entries in OFT. (C) Number of suspension immobility in TST. (D) Number of suspension immobility in FST. Data are presented as mean ± standard error of the mean (SEM). Statistical significance was determined by two-way ANOVA compared to control groups: i.g.: intragastrically; Con:control group; JYHH: Jie-Yu-He-Huan capsules group; Cur: curcumin; MJYHH: modified Jie-Yu-He-Huan capsules group; FLX: fluoxetine group.


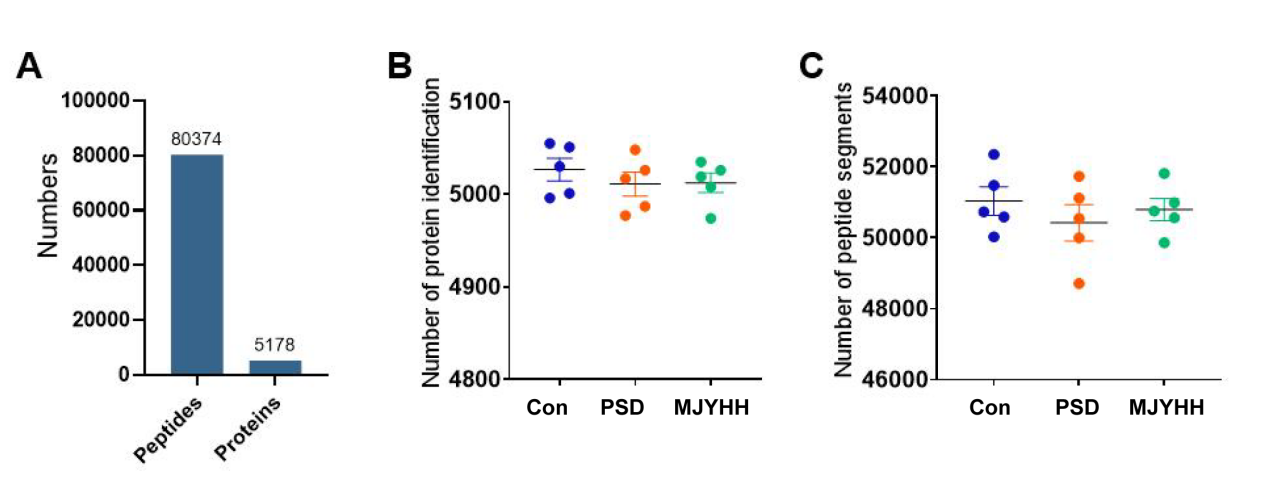


**Supplementary figure. 3 Supplementary data of DIA**

1. Statistical graph of proteins and peptide segments. (B) Number of protein identification. (C) Number of peptide segments. Con:control group; JYHH: Jie-Yu-He-Huan capsules group; Cur: curcumin; MJYHH: modified Jie-Yu-He-Huan capsules group; FLX: fluoxetine group.
